# Supplementary material for: Autocrine INSL5 promotes tumor progression and glycolysis via activation of STAT5 signaling
Source: PubMed Central journal article supplement (PMC7507000; doi:10.15252/emmm.202012050), 2020-07-12

Fig 4D

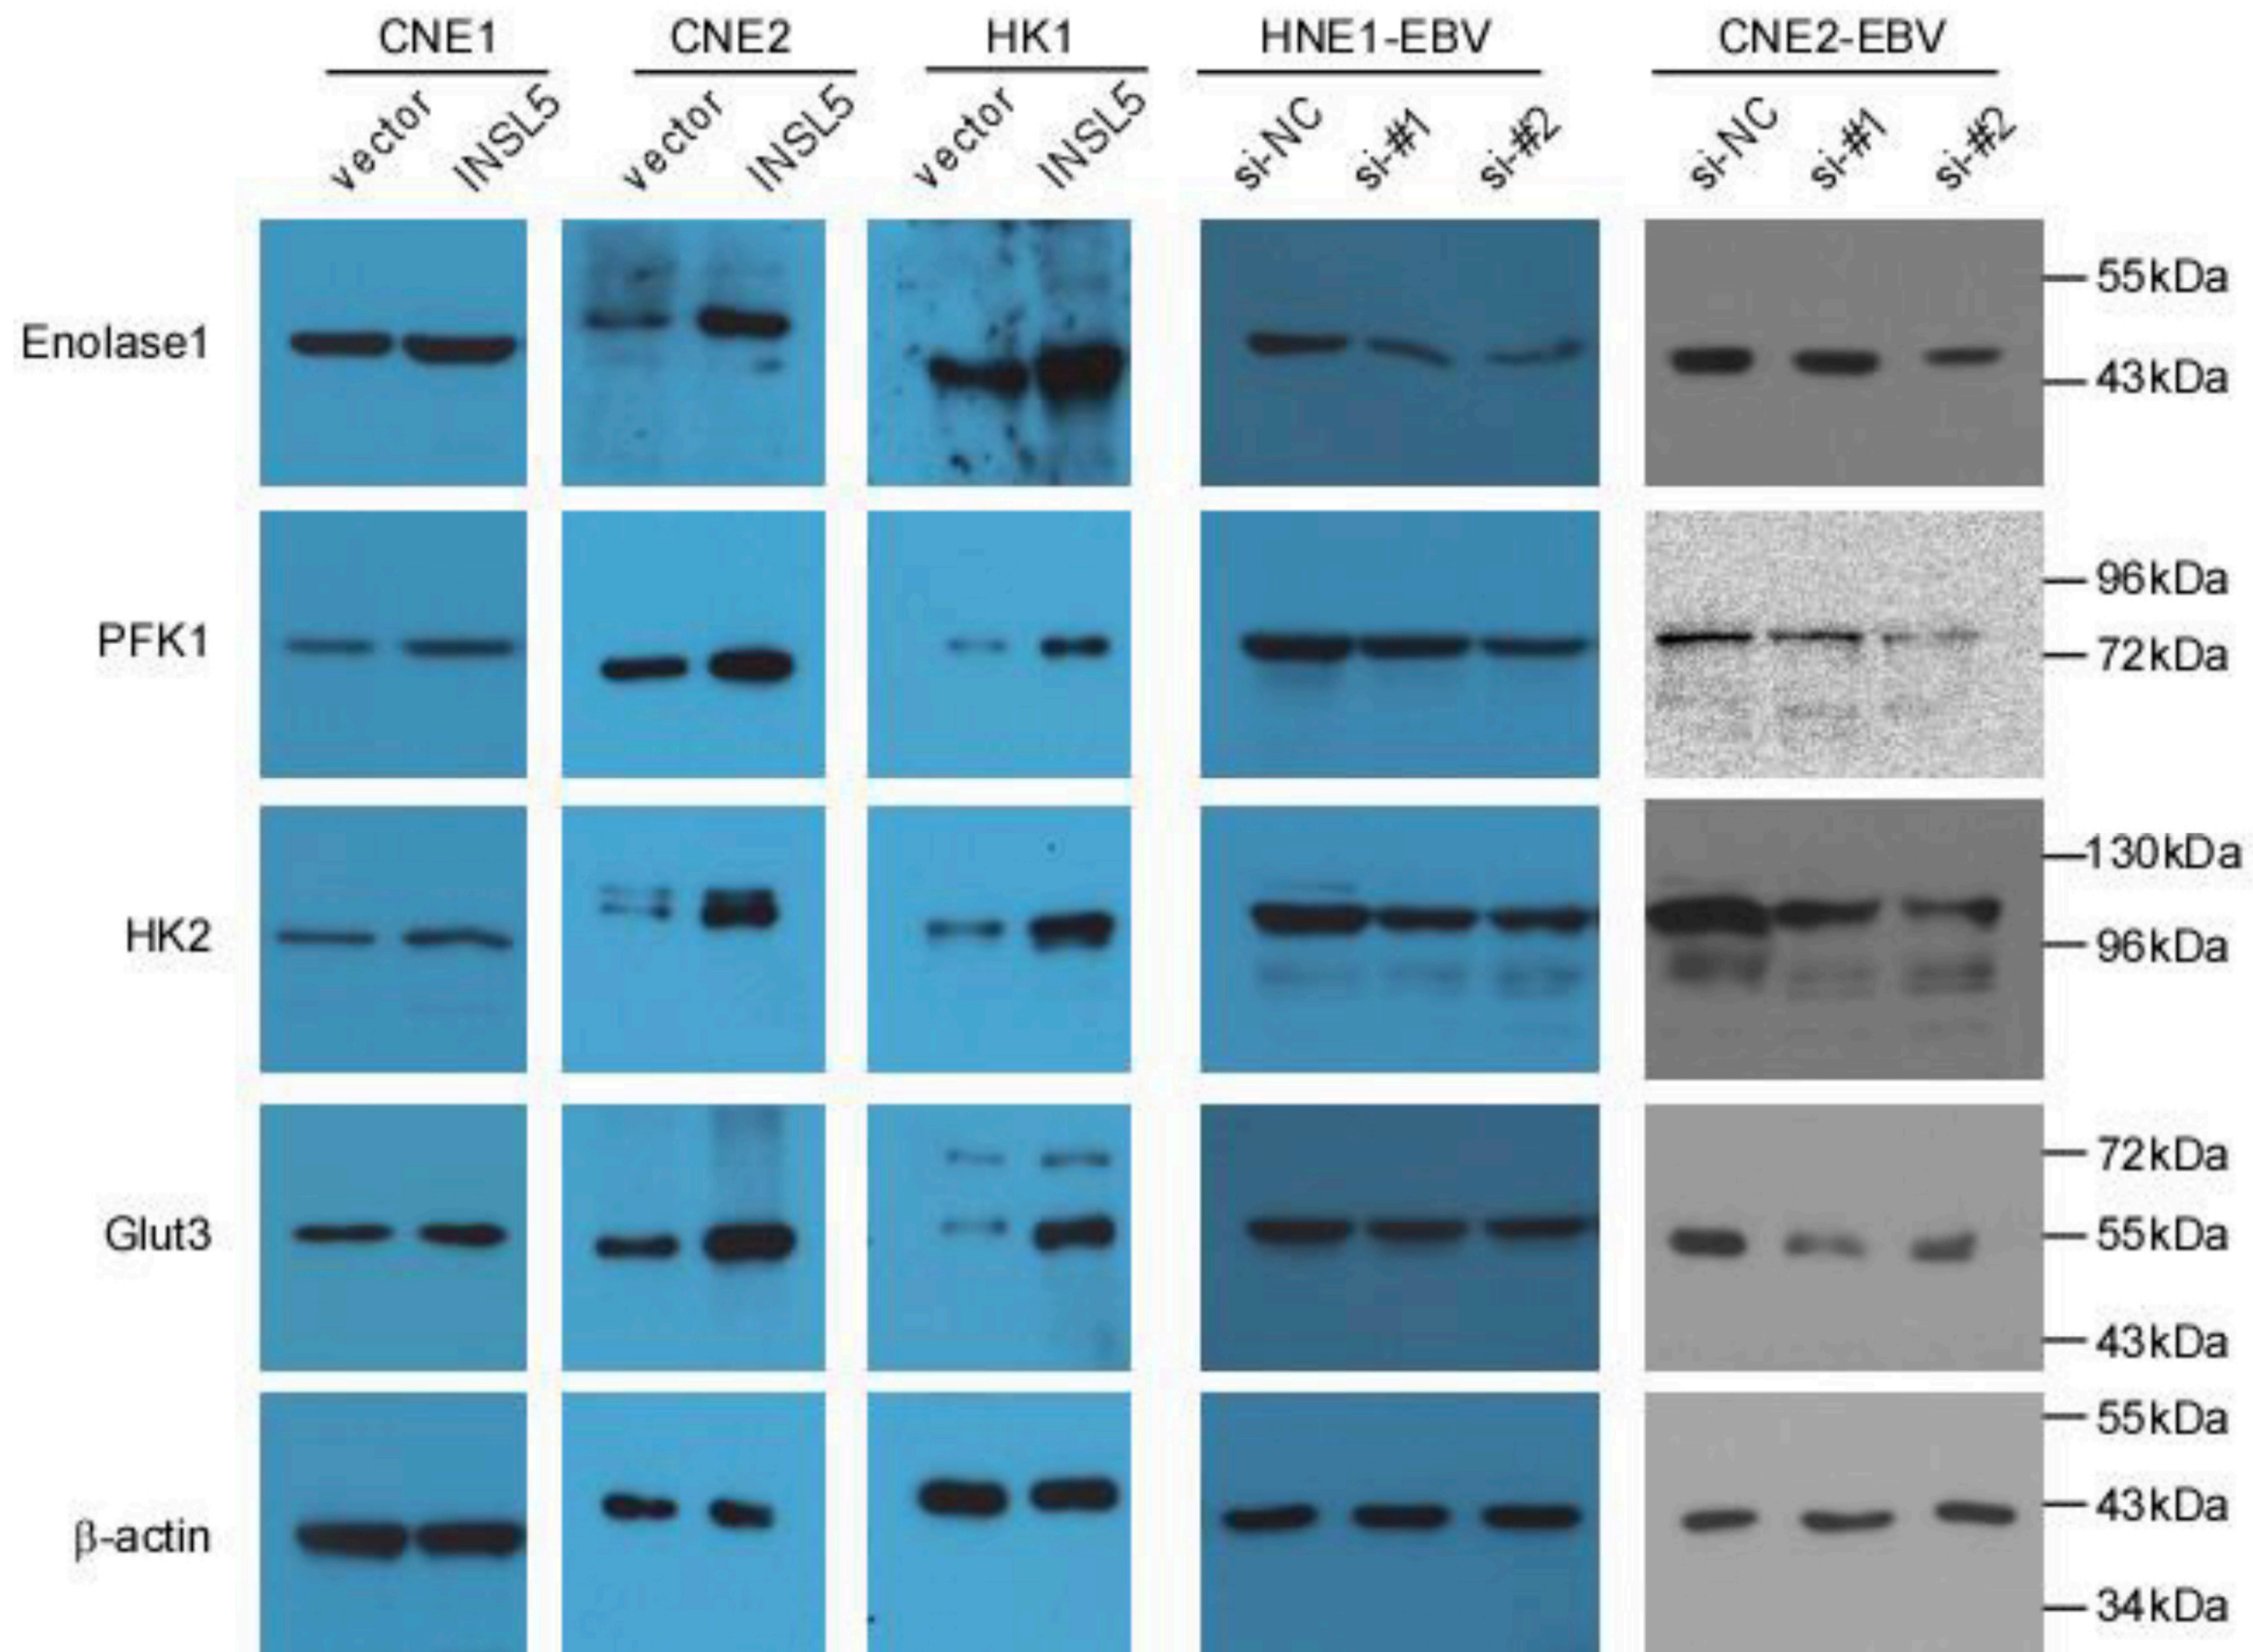

Supplement: EMMM-12-e12050-s005.pdf [file EMMM-12-e12050-s005.pdf]
